# Supplementary material
Source: PubMed Central journal article supplement (PMC2904651)
Supplement: NIHMS216503-supplement-01.pdf [file NIHMS216503-supplement-01.pdf]

Fig.S1

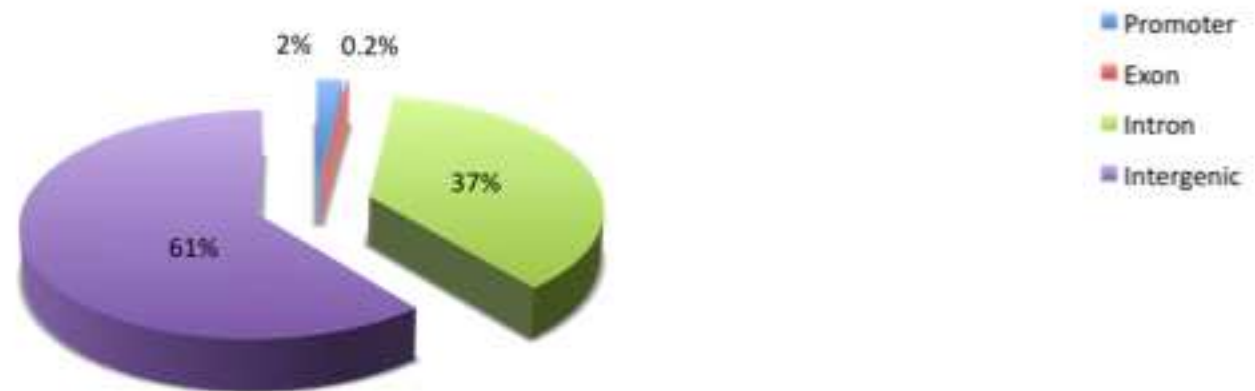

Fig. S2

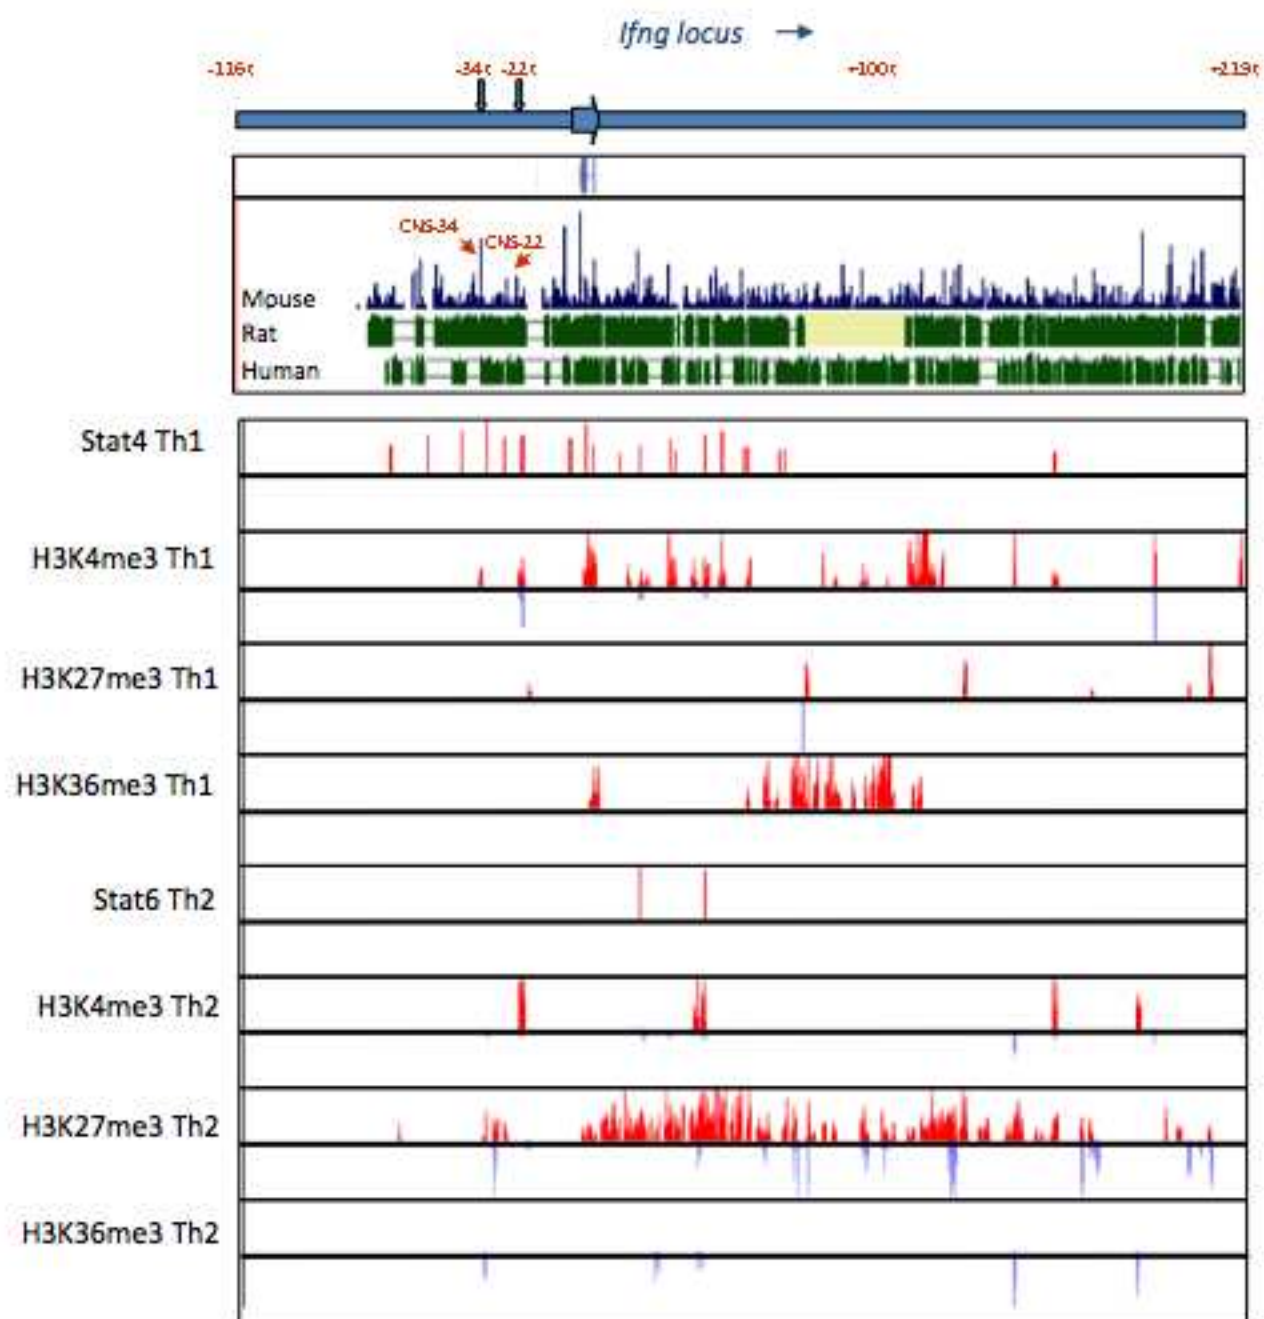

Fig.S3A

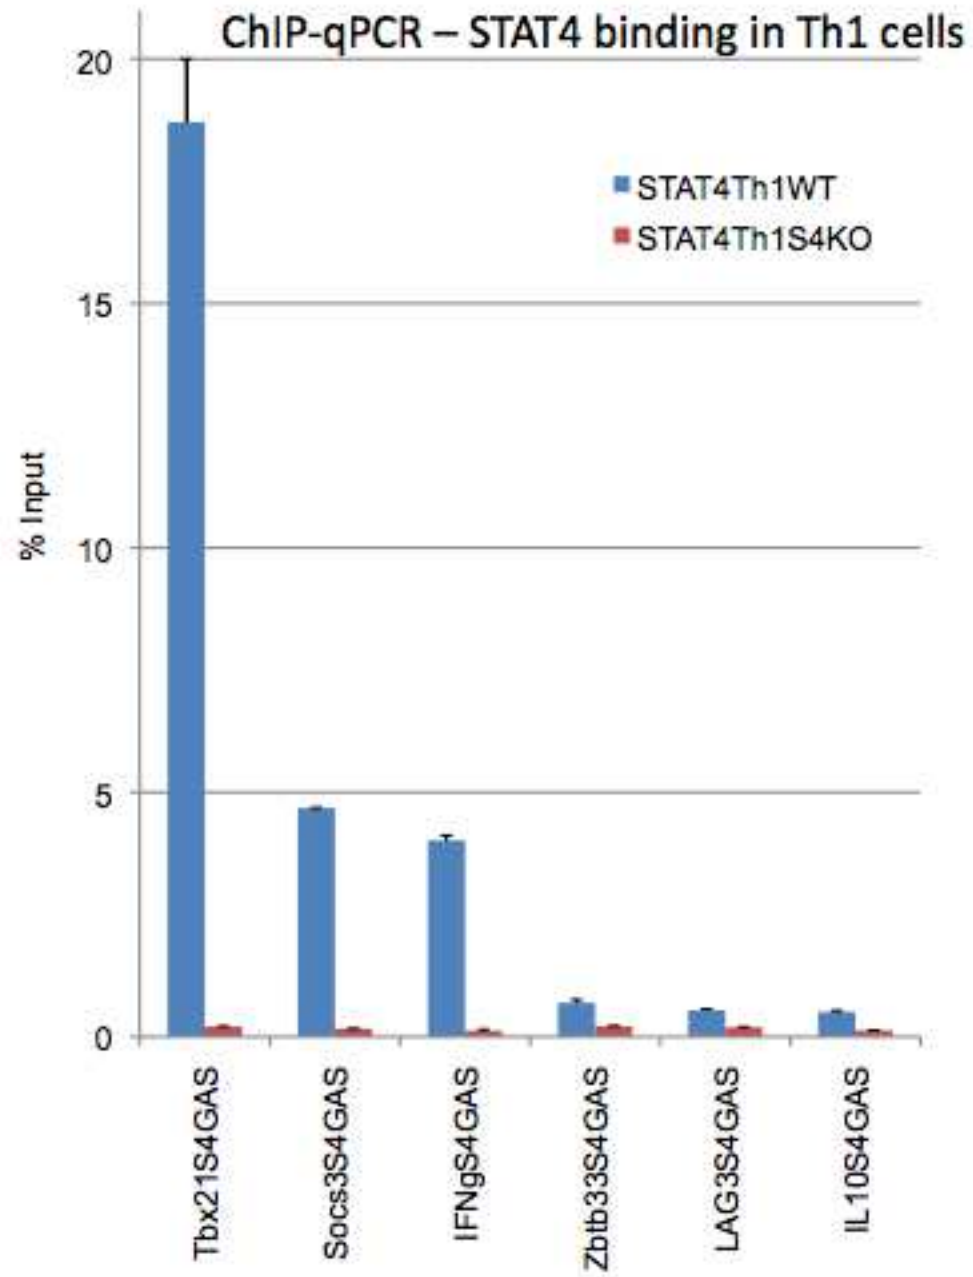

Fig.S3B

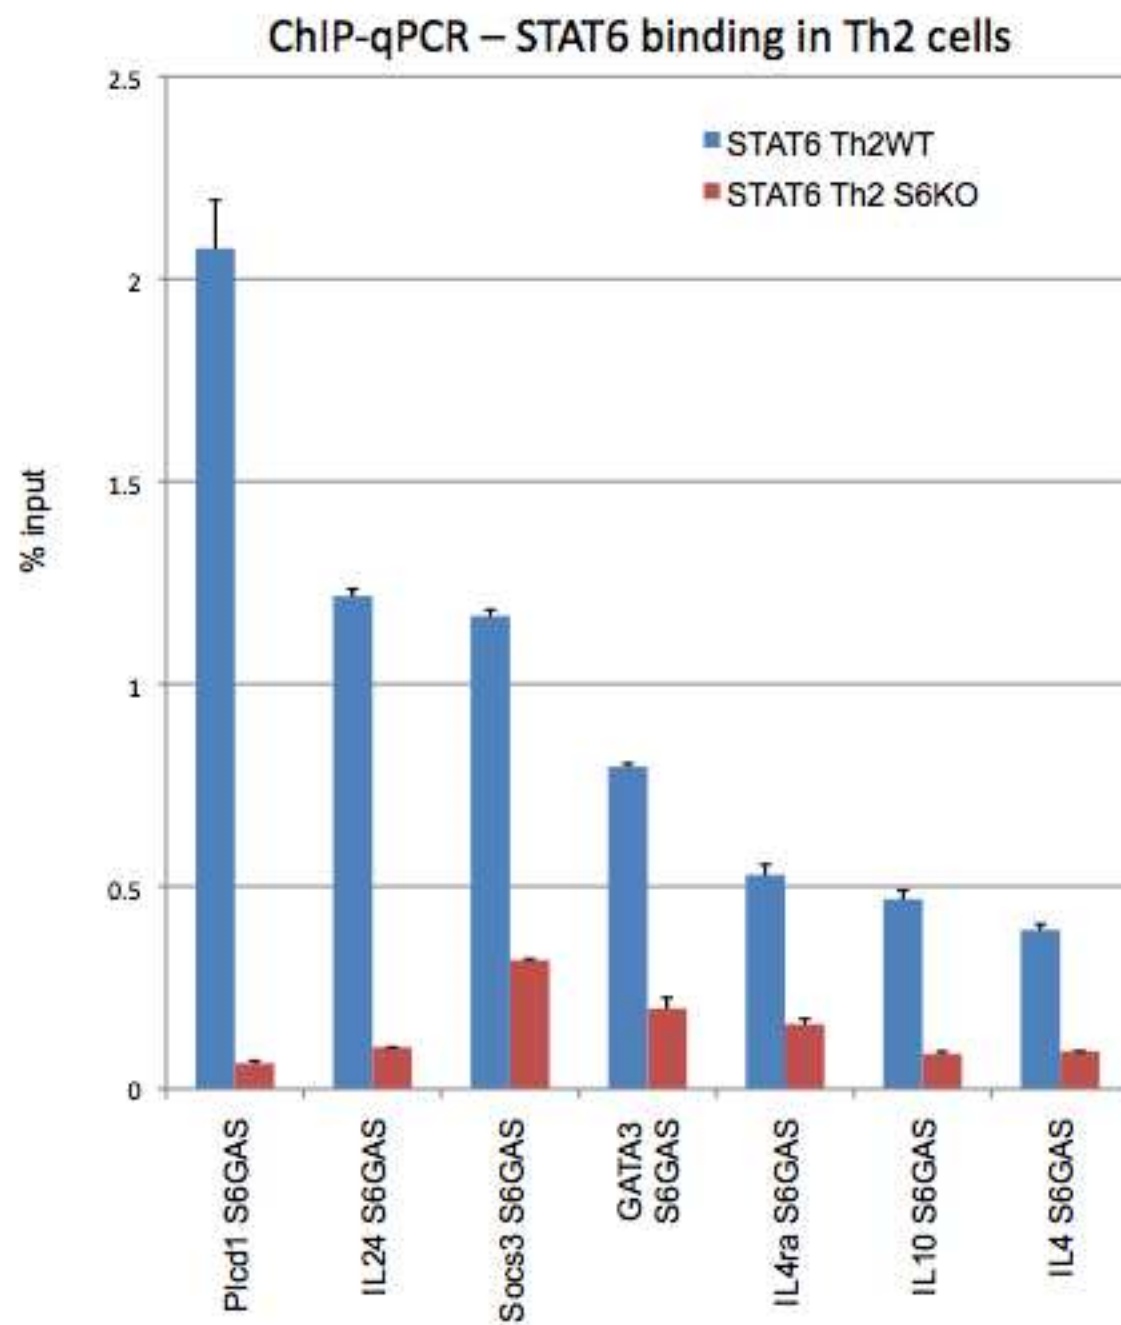

Fig.S4

|                               | STAT binding          | Epigenetic pattern |                  |                                          |          |          | Gene expression                      |                                      |               |                 |               |  |           |
|-------------------------------|-----------------------|--------------------|------------------|------------------------------------------|----------|----------|--------------------------------------|--------------------------------------|---------------|-----------------|---------------|--|-----------|
|                               | epigenetic cluster    | # of genes         | Genes in cluster | STAT dependent epigenetic change (WT/KO) |          |          | STAT induced gene expression (WT/KO) | Th preferential expression (Th1/Th2) |               |                 |               |  |           |
|                               |                       |                    |                  | H3K4me3                                  | H3K36me3 | H3K27me3 |                                      |                                      | Up regulation | Down regulation |               |  |           |
| STAT4 bound genes<br><br>4486 | K4 high               | 257                | Zbtb32           | 251                                      | 0        | 0        | 2.8                                  | Up regulation                        |               | Th1 > Th2       |               |  |           |
|                               |                       |                    | Nkg7             | 230                                      | 0        | 0        | 10.3                                 |                                      |               |                 |               |  |           |
|                               |                       |                    | Lilrb4           | 145                                      | 0        | 0        | 2.7                                  |                                      |               |                 |               |  |           |
|                               |                       |                    | Il8rb            | 143                                      | 0        | 0        | 4.8                                  |                                      |               |                 |               |  |           |
|                               | K36 high              | 191                | Il121            | 113                                      | 175      | 0        | 198.1                                |                                      |               |                 |               |  |           |
|                               |                       |                    | Ifng             | 144                                      | 66       | 0        | 17.6                                 |                                      |               |                 |               |  |           |
|                               |                       |                    | Skap2            | 2.4                                      | 48       | 0.89     | 3.6                                  |                                      |               |                 |               |  |           |
|                               |                       |                    | Tbx21            | 6.1                                      | 6.3      | 0        | 1.9                                  |                                      |               |                 |               |  |           |
|                               | K27 low               | 316                | Atf3             | 2                                        | 5.4      | 0.006    | 4.2                                  |                                      |               |                 |               |  |           |
|                               |                       |                    | Gbp2             | 3.5                                      | 1.3      | 0.025    | 2.7                                  |                                      |               |                 |               |  |           |
| Casp4                         |                       |                    | 4.6              | 2.8                                      | 0.031    | 3.3      |                                      |                                      |               |                 |               |  |           |
| Icos                          |                       |                    | 2.6              | 1.5                                      | 0.05     | 3.6      |                                      |                                      |               |                 |               |  |           |
| indeterminate pattern         | 3384                  | Il18rap            | 6.9              | 4.4                                      | 0        | 6.2      |                                      |                                      |               |                 |               |  |           |
|                               |                       | Il18r1             | 1.8              | 1.9                                      | 0        | 3.6      |                                      |                                      |               |                 |               |  |           |
|                               |                       | Zbtb33             | 2.7              | 0.8                                      | 0        | 3        |                                      |                                      |               |                 |               |  |           |
|                               |                       | Furin              | 5.4              | 3.5                                      | 0        | 2.2      |                                      |                                      |               |                 |               |  |           |
|                               |                       | Gata3              | 2.3              | 1                                        | 0.37     | 0.17     |                                      |                                      |               |                 |               |  |           |
|                               |                       | Myo6               | 1.4              | 0                                        | 0        | 0.11     |                                      |                                      |               |                 |               |  |           |
|                               |                       | Tnfrsf10           | 1.9              | 0.77                                     | 0        | 0.36     |                                      |                                      |               |                 |               |  |           |
| Cpd                           | 2.4                   | 0                  | 2.4              | 0.41                                     |          |          |                                      |                                      |               |                 |               |  |           |
| K27 high                      | 256                   | Rreb1              | 7                | 0.5                                      | 79       | 0.48     | Down regulation                      |                                      | Th2 > Th1     |                 |               |  |           |
|                               |                       | Ccr8               | 2.8              | 0                                        | 40       | 0.17     |                                      |                                      |               |                 |               |  |           |
|                               |                       | Dhx34              | 1.5              | 0.68                                     | 27       | 0.49     |                                      |                                      |               |                 |               |  |           |
|                               |                       | Dnmt3a             | 1.9              | 1.3                                      | 22       | 0.45     |                                      |                                      |               |                 |               |  |           |
| K36 low                       | 82                    | Osbpl3             | 0.93             | 0.0063                                   | 0        | 0.098    |                                      |                                      |               |                 |               |  |           |
|                               |                       | Socs2              | 2.4              | 0.0078                                   | 0        | 0.51     |                                      |                                      |               |                 |               |  |           |
|                               |                       | Plekha1            | 1.2              | 0.0087                                   | 95       | 0.28     |                                      |                                      |               |                 |               |  |           |
|                               |                       | Mcoln2             | 1.8              | 0.053                                    | 0        | 0.091    |                                      |                                      |               |                 |               |  |           |
| STAT6 bound genes<br><br>4136 | K36 high              | 169                | Pparg            | 2.1                                      | 1310     | 1        |                                      |                                      |               | 10.6            | Up regulation |  | Th2 > Th1 |
|                               |                       |                    | Picd1            | 1.6                                      | 576      | 0.063    |                                      |                                      |               | 16              |               |  |           |
|                               |                       |                    | Pros1            | 1.5                                      | 46.3     | 0        | 5.4                                  |                                      |               |                 |               |  |           |
|                               |                       |                    | Hipk2            | 4.7                                      | 9        | 0.3      | 3.4                                  |                                      |               |                 |               |  |           |
|                               | K27 low               | 487                | Ikarf3           | 1.3                                      | 5.4      | 0.0075   | 4.7                                  |                                      |               |                 |               |  |           |
|                               |                       |                    | Il4ra            | 1.4                                      | 1.1      | 0.013    | 5.2                                  |                                      |               |                 |               |  |           |
|                               |                       |                    | Il24             | 4                                        | 8.7      | 0.023    | 191                                  |                                      |               |                 |               |  |           |
|                               |                       |                    | Il4              | 3.6                                      | 2        | 0.042    | 6.5                                  |                                      |               |                 |               |  |           |
|                               | indeterminate pattern | 3176               | Gata3            | 1.3                                      | 1.9      | 0.11     | 2.8                                  |                                      |               |                 |               |  |           |
|                               |                       |                    | Prdm1            | 1.8                                      | 3.3      | 1.2      | 28.9                                 |                                      |               |                 |               |  |           |
|                               |                       |                    | Nfil3            | 2.7                                      | 3.5      | 0        | 13.6                                 |                                      |               |                 |               |  |           |
|                               |                       |                    | F2rl2            | 1.5                                      | 2.2      | 0        | 18.4                                 |                                      |               |                 |               |  |           |
|                               |                       |                    | Asb2             | 1.8                                      | 7.8      | 0.28     | 19.6                                 |                                      |               |                 |               |  |           |
|                               |                       |                    | Impa2            | 1.3                                      | 1.2      | 0        | 5.8                                  |                                      |               |                 |               |  |           |
|                               |                       |                    | Irf1             | 0.9                                      | 0.79     | 0        | 0.19                                 |                                      |               |                 |               |  |           |
|                               |                       |                    | Irf8             | 1.1                                      | 0.63     | 0.61     | 0.2                                  |                                      |               |                 |               |  |           |
| K27 high                      | 185                   | Slamf6             | 1.1              | 1.4                                      | 0        | 0.22     |                                      |                                      |               |                 |               |  |           |
|                               |                       | Cd27               | 0.9              | 0.48                                     | 0        | 0.31     |                                      |                                      |               |                 |               |  |           |
|                               |                       | Tcf7               | 0.65             | 0.68                                     | 782      | 0.24     |                                      |                                      |               |                 |               |  |           |
|                               |                       | Il18rap            | 0.89             | 0.42                                     | 252      | 1        |                                      |                                      |               |                 |               |  |           |
| K36 low                       | 119                   | Gfod1              | 1.1              | 0.23                                     | 49       | 0.65     | Down regulation                      |                                      | Th1 > Th2     |                 |               |  |           |
|                               |                       | Il18r1             | 0.67             | 0.19                                     | 23.6     | 0.34     |                                      |                                      |               |                 |               |  |           |
|                               |                       | Cnksr3             | 0.78             | 0.0018                                   | 1.1      | 0.15     |                                      |                                      |               |                 |               |  |           |
|                               |                       | Cd9                | 0.69             | 0.003                                    | 3.9      | 0.13     |                                      |                                      |               |                 |               |  |           |
| Ltb                           | 1                     | 0.017              | 0                | 0.37                                     |          |          |                                      |                                      |               |                 |               |  |           |
| Lta                           | 0.79                  | 0.042              | 0                | 0.15                                     |          |          |                                      |                                      |               |                 |               |  |           |

Fig.S5A

### STAT4 negatively regulated genes

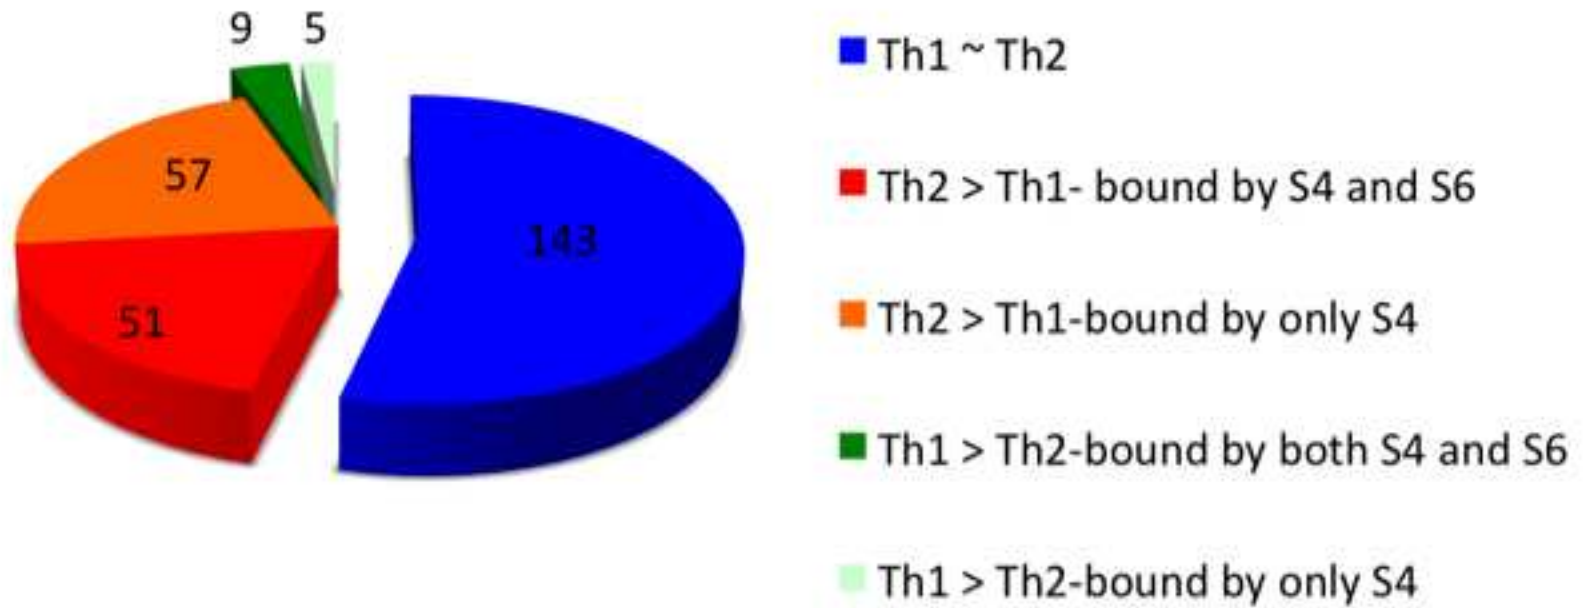

Fig.S5B

### STAT6 negatively regulated genes

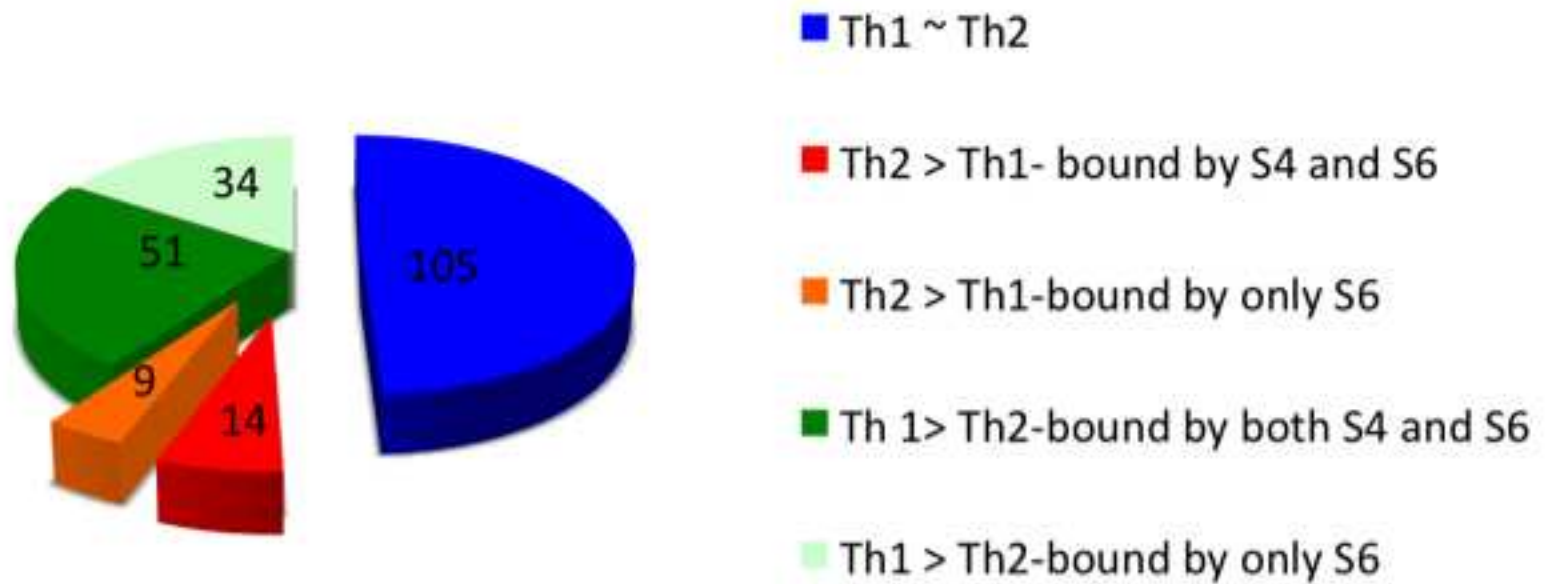

Table S1

| Th1                     | STAT4<br>WT | STAT4<br>S4KO | H3K4m3<br>WT | H3K4m3<br>S4KO | H3K27m3<br>WT | H3K27m3<br>S4KO | H3K36m3<br>WT | H3K36m3<br>S4KO |
|-------------------------|-------------|---------------|--------------|----------------|---------------|-----------------|---------------|-----------------|
| Total unique tag counts | 8982352     | 7456487       | 6109411      | 5910481        | 11318254      | 11034146        | 6494702       | 6529887         |
| Total peak counts       | 10831       | 426           | 28852        | 21353          | 29016         | 21475           | 45784         | 45998           |
| Th2                     | STAT6<br>WT | STAT6<br>S6KO | H3K4m3<br>WT | H3K4m3<br>S6KO | H3K27m3<br>WT | H3K27m3<br>S6KO | H3K36m3<br>WT | H3K36m3<br>S6KO |
| Total unique tag counts | 7447154     | 8239713       | 10654272     | 10233966       | 11985394      | 12075479        | 10464547      | 8996600         |
| Total peak counts       | 8434        | 1002          | 27587        | 28901          | 51057         | 57918           | 49998         | 58197           |



## Supplemental Text and Figures

[Click here to download Supplemental Text and Figures: Table S2.xls](#)

0 Plekhg2  
1 Sorl1  
2 Pcx  
3 Ebf1  
4 Atp13a2  
5 Nampt  
6 Eif2ak4  
7 Tspan3  
    8-Sep-07  
9 Pknox1  
10 Tspan4  
11 Tspan5  
12 Rybp  
13 Ube2d1  
14 E130120F12Rik  
15 Enthd1  
16 Irf8  
17 Sos2  
18 Sos1  
19 Cd5  
20 Prph2  
21 4930441O14Rik  
22 B2m  
23 Prm1  
24 1500009L16Rik  
25 Sult2b1  
26 Rhoq  
27 Mitf  
28 Gpx8  
29 Bcl6  
30 Sh3gl3  
31 Bcl2  
32 Map3k11  
33 Samd14  
34 Orc4l  
35 Stk40  
36 Unk  
37 Kcnj12  
38 E2f3  
39 Cirbp  
40 Ccdc114  
41 Tk1  
42 Fam78a  
43 Uqcrq  
44 Gnaq  
45 Glg1  
46 Akt2  
47 Wdr81  
48 Wdr82

Table S3

|                       |                             |                       |                             |
|-----------------------|-----------------------------|-----------------------|-----------------------------|
| mIFN $\gamma$ forward | AAG GCT CCC TGT GCT GTG C   | mIFN $\gamma$ reverse | GTC TCC CCC TTT TTG CCC T   |
| mTbx21 forward        | CAC CAT CTC GCT TTC CGC T   | mTbx21 reverse        | TCC CCC TGG CTG ACT TTT C   |
| mLag3 forward         | GCA AAC CCA CTG CAG CTA GC  | mLag3 reverse         | AAG CAG AAG GAC TGG GTC TGG |
| mZbtb33 forward       | CTC ACG GAG CCG AGC TCT T   | mZbtb33 reverse       | CCG TGA CTG CGA AGC ATT TT  |
| mSOCS3 forward        | GGA GAG ACA GCG GTC GTA AGA | mSOCS3 reverse        | TCC GAG GCG GCT CTA ACT C   |
| mIL10 forward         | AAC CCT AGT TCC CAG AAG CCA | mIL10 reverse         | CAG GTG TCT CTG CCT AGC CC  |
| mPlcd1 forward        | AAC GTC ATG CTC AAG TGC TGA | mPlcd1 reverse        | GGG AGA AGA AAG AGG ATG GGA |
| mIL24 forward         | GGT CAT GCT TCC CTG GAG AA  | mIL24 reverse         | ACC CCC CTG TCT AAG AGC AAA |
| mGATA3 forward        | TTT AAA CTC GGA GCG CAA ATC | mGATA3 reverse        | TGG TGA GGC GGA TAC TGG AT  |
| mIL4ra forward        | TAA GCC AGC GAT CAG GCA A   | mIL4ra reverse        | CCC CTC ACC CAG CTC ATT T   |
| mIL4 forward          | GCA GGC AGA AAG GGA AGA GA  | mIL4 reverse          | TGG CTG GAG TCT GAC CAT CC  |

| Gene        | Exp WT     | Exp KO     | Exp WT/KO  | K4WT | K4KO |    |
|-------------|------------|------------|------------|------|------|----|
| Rybp        | 280.591987 | 264.422292 | 1.06115103 |      | 64   | 1  |
| Gpx8        | 37.7252878 | 19.1896966 | 1.96591371 |      | 34   | 1  |
| Sh3gl3      | 115.592181 | 64.4223775 | 1.79428617 |      | 33   | 1  |
| Gnaq        | 174.591559 | 142.422177 | 1.2258734  |      | 342  | 1  |
| Akt2        | 532.593127 | 273.422849 | 1.94787352 |      | 105  | 1  |
| Unc5c       | 22.5216403 | 12.3756294 | 1.81983796 |      | 31   | 1  |
| 4833422F24F | 29.2426064 | 35.5742146 | 0.82201692 |      | 16   | 1  |
| Clcnkb      | 45.6151134 | 52.4245257 | 0.87011018 |      | 41   | 1  |
| Col16a1     | 104.592094 | 116.422008 | 0.89838765 |      | 34   | 1  |
| Slc17a6     | 91.5920198 | 28.9682374 | 3.16180852 |      | 31   | 1  |
| P2rx6       | 71.5921748 | 81.4221832 | 0.87927113 |      | 27   | 1  |
| Mybph       | 55.5937194 | 44.4419434 | 1.25092908 |      | 64   | 1  |
| Gm7367      | 240.592857 | 109.422074 | 2.19875979 |      | 273  | 21 |
| Ccl3        | 20330.5271 | 4617.416   | 4.40300963 |      | 45   | 1  |
| 4930451C15F | 30.1484097 | 30.8113502 | 0.97848389 |      | 27   | 1  |
| Klhl5       | 128.59226  | 248.422149 | 0.51763605 |      | 19   | 1  |
| Ano7        | 25.753025  | 63.4223751 | 0.40605583 |      | 66   | 1  |
| Calr4       | 114.5918   | 94.4219256 | 1.21361431 |      | 17   | 1  |
| Rpph1       | 14.761424  | 19.8994962 | 0.74179888 |      | 57   | 1  |
| Bcas1       | 45.6151134 | 57.4227294 | 0.79437383 |      | 63   | 1  |
| Zbtb12      | 38.7010284 | 65.4222739 | 0.59155737 |      | 41   | 1  |
| Fam54a      | 82.5919919 | 126.422549 | 0.65330111 |      | 87   | 1  |
| Kremen2     | 3027.60232 | 2779.42358 | 1.08929144 |      | 189  | 1  |
| Ngef        | 73.5921511 | 73.422483  | 1.00231085 |      | 30   | 1  |
| 4930519G04F | 15.8432895 | 13.2991303 | 1.19130267 |      | 69   | 1  |
| Lim2        | 119.592242 | 111.421976 | 1.07332724 |      | 16   | 1  |
| Hfm1        | 81.5922376 | 30.8113502 | 2.64812275 |      | 24   | 1  |
| Epb4.1l2    | 887.590244 | 1119.42333 | 0.79289954 |      | 40   | 1  |
| Mcm3        | 445.592148 | 579.421738 | 0.76902905 |      | 58   | 1  |
| 2200002D01F | 58.5927395 | 48.4290232 | 1.20986829 |      | 18   | 1  |
| Cnn3        | 653.593579 | 310.422646 | 2.1054958  |      | 90   | 1  |
| Syt16       | 7.30989154 | 7.54829078 | 0.96841679 |      | 22   | 1  |
| Ppp4r1      | 583.593498 | 602.42173  | 0.96874576 |      | 76   | 1  |
| Ablim3      | 14.761424  | 12.3756294 | 1.19278168 |      | 31   | 1  |
| Lonrf3      | 707.590074 | 656.422099 | 1.0779498  |      | 76   | 1  |
| Ralgds      | 301.591091 | 350.422111 | 0.86065086 |      | 64   | 1  |
| Ltbp2       | 17.0091601 | 13.2991303 | 1.27896785 |      | 102  | 1  |
| 6330406I15R | 16.4155365 | 17.835503  | 0.9203854  |      | 31   | 1  |
| Hao1        | 25.753025  | 22.9474191 | 1.12226237 |      | 39   | 1  |
| Mfrp        | 179.59209  | 163.422181 | 1.09894562 |      | 20   | 1  |
| Cacna1i     | 397.5934   | 175.422501 | 2.26649032 |      | 35   | 1  |
| Ttll13      | 61.5923812 | 63.4223751 | 0.97114593 |      | 113  | 1  |
| Wwp1        | 441.591931 | 217.422887 | 2.03102782 |      | 125  | 1  |
| Zbtb20      | 91.5920198 | 130.422593 | 0.70227111 |      | 16   | 1  |
| Prune2      | 57.5929374 | 53.4237744 | 1.07803947 |      | 101  | 1  |
| Cwh43       | 20.2977794 | 30.8113502 | 0.65877604 |      | 21   | 1  |
| Svop        | 36.754271  | 41.4632127 | 0.88643085 |      | 85   | 1  |
| Nras        | 1123.59002 | 726.419943 | 1.54674996 |      | 66   | 1  |
| Spns2       | 70.5918634 | 32.6936829 | 2.1591897  |      | 42   | 1  |
| Cxcr6       | 1315.59526 | 170.422263 | 7.7196209  |      | 496  | 42 |
| Lrp11       | 30.1484097 | 80.4220942 | 0.3748772  |      | 55   | 1  |
| Brpf3       | 123.591867 | 98.4220731 | 1.25573322 |      | 80   | 1  |

| Gene        | ID         | Th1WT      | Th1S4KO    | Th2WT      | Th2S6KO    |
|-------------|------------|------------|------------|------------|------------|
| Nuak2       | NM_028778  | 143.591844 | 132.42209  | 33.1126369 | 71.6711203 |
| Sntg1       | NM_027671  | 24.1014828 | 38.5032948 | 18.2762731 | 12.7029353 |
| Bai3        | NM_175642  | 9.24395348 | 9.39888749 | 8.01926493 | 6.19056034 |
| Prim2       | NM_008922  | 73.5921511 | 79.4221769 | 229.59382  | 37.6962733 |
| Als2cr12    | NM_175370  | 77.5922147 | 126.422549 | 28.6481486 | 59.6710807 |
| Obsl1       | NM_178884  | 50.5984049 | 64.4223775 | 106.593821 | 38.6900316 |
| Serpib3b    | NM_198680  | 9.24395348 | 21.3829649 | 12.3656828 | 15.6638831 |
| Dpp10       | NM_199021  | 11.5925818 | 17.835503  | 20.1860958 | 11.6908668 |
| Capn8       | NM_130890  | 48.6028834 | 47.431382  | 18.2762731 | 24.2766929 |
| Cd247       | NM_0011133 | 248.592679 | 254.422068 | 234.593625 | 136.670683 |
| Spna1       | NM_011465  | 18.9182928 | 23.7584696 | 17.6796769 | 17.0247298 |
| Cd247       | NM_031162  | 248.592679 | 254.422068 | 234.593625 | 136.670683 |
| A830018L16F | NM_177173  | 11.9904176 | 13.2991303 | 14.9905353 | 18.4840629 |
| Lactb2      | NM_145381  | 176.592468 | 158.422122 | 624.591879 | 375.672057 |
| A830018L16F | NM_0011603 | 176.592468 | 158.422122 | 624.591879 | 375.672057 |
| Cpa6        | NM_177834  | 12.4056034 | 11.1326103 | 13.6010865 | 12.1850478 |
| Efhc1       | NM_027974  | 12.4056034 | 11.1326103 | 13.6010865 | 12.1850478 |
| Khdrbs2     | NM_133235  | 66.5921401 | 90.4225062 | 58.5959887 | 63.6708006 |
| Tmem182     | NM_0010811 | 20.2977794 | 25.4333571 | 23.0096957 | 15.6638831 |
| Fam178b     | NM_201365  | 76.5919041 | 83.4222316 | 27.794355  | 26.0891855 |
| 2010300C02F | NM_028096  | 76.5919041 | 83.4222316 | 27.794355  | 26.0891855 |
| Dnahc7b     | NM_0011603 | 76.5919041 | 83.4222316 | 27.794355  | 26.0891855 |
| Tpp2        | NM_009418  | 332.592079 | 206.421581 | 184.593763 | 182.670518 |
| Plcl1       | NM_0011146 | 8.19281933 | 16.5699805 | 17.1029111 | 13.2451291 |
| Cd28        | NM_007642  | 3168.60037 | 1135.41973 | 2292.60167 | 1545.67362 |
| Pard3b      | NM_0010810 | 108.591698 | 64.4223775 | 59.5954383 | 45.6733277 |
| Erbp4       | NM_010154  | 21.7602013 | 10.3917016 | 7.61550654 | 8.50705629 |
| Spag16      | NM_029160  | 12.8387247 | 25.4333571 | 15.4900511 | 17.742286  |
| Abca12      | NM_175210  | 65.5920927 | 62.4223169 | 25.3251692 | 40.6817546 |
| Dock10      | NM_175291  | 3690.60085 | 4030.43545 | 2982.59009 | 5586.65881 |
| Agfg1       | NM_010472  | 1426.59489 | 1425.41866 | 533.594505 | 910.673441 |
| Armc9       | NM_030184  | 16.4155365 | 15.9705268 | 29.5163004 | 11.2198385 |
| Eif4e2      | NM_023314  | 3430.58762 | 2065.42077 | 2918.59841 | 1901.66842 |
| Armc9       | NM_027456  | 16.4155365 | 15.9705268 | 29.5163004 | 11.2198385 |
| Per2        | NM_011066  | 50.5984049 | 62.4223169 | 139.593698 | 105.671316 |
| Hisppd1     | NM_173760  | 369.592072 | 458.421215 | 256.593355 | 691.669965 |
| Farp2       | NM_145519  | 30.1484097 | 47.431382  | 32.1966794 | 27.9522013 |
| St8sia4     | NM_009183  | 760.592551 | 536.424009 | 2956.59312 | 634.668751 |
| Cntnap5b    | NM_172851  | 760.592551 | 536.424009 | 2956.59312 | 634.668751 |
| Ptpn4       | NM_019933  | 122.591913 | 48.4290232 | 118.593407 | 41.678747  |
| R3hdm1      | NM_181750  | 687.592501 | 800.423659 | 1237.59195 | 1669.67315 |
| Nckap5      | NM_176957  | 14.2511852 | 20.6308306 | 24.5353509 | 10.7712965 |
| Ikbke       | NM_019777  | 630.590664 | 1862.41646 | 570.593697 | 1412.6712  |
| Nckap5      | NM_172484  | 14.2511852 | 20.6308306 | 24.5353509 | 10.7712965 |
| Kif14       | NM_0010812 | 11.2115202 | 11.5287964 | 14.5095412 | 12.1850478 |
| Adipor1     | NM_028320  | 68.5920753 | 73.422483  | 122.593612 | 110.670738 |
| Nav1        | NM_173437  | 14.2511852 | 73.422483  | 106.593821 | 167.671073 |
| Nek7        | NM_021605  | 1061.58929 | 1629.42813 | 2194.59651 | 1505.67011 |
| Etnk2       | NM_175443  | 165.592096 | 112.421955 | 20.1860958 | 81.6708875 |
| Rabgap1l    | NM_013862  | 185.591908 | 121.422334 | 143.593835 | 100.670697 |
| Tnr         | NM_022312  | 185.591908 | 121.422334 | 143.593835 | 100.670697 |
| Bat2d       | NM_0010812 | 98.59209   | 97.4222907 | 146.593772 | 78.6709991 |
